# Supplementary material for: Pharmacokinetic-Pharmacodynamic Analysis of Spiroindolone Analogs and KAE609 in a Murine Malaria Model
Source: PubMed Central journal article supplement (PMC4335872; doi:10.1128/aac.03274-14), 2015-01-27
Supplement: AAC.03274-14_zac002153716so1.pdf [file AAC.03274-14_zac002153716so1.pdf]

Running title: Preclinical PK-PD of antimalarials

1 **Pharmacokinetics-pharmacodynamics analysis of spiroindolone analogs and KAE609 in**  
2 **a murine malaria model**

3 Suresh B. Lakshminarayana<sup>1#</sup>, Céline Freymond<sup>2,3</sup>, Christoph Fischli<sup>2,3</sup>, Jing Yu<sup>4</sup>, Sebastian  
4 Weber<sup>5</sup>, Anne Goh<sup>1</sup>, Bryan K. S. Yeung<sup>1</sup>, Paul C. Ho<sup>6</sup>, Véronique Dartois<sup>1,a</sup>, Thierry T.  
5 Diagana<sup>1</sup>, Matthias Rottmann<sup>2,3</sup> and Francesca Blasco<sup>1#</sup>

6

7 <sup>(1)</sup>Novartis Institute for Tropical Diseases, Singapore

8 <sup>(2)</sup>Swiss Tropical and Public Health Institute, Basel, Switzerland

9 <sup>(3)</sup>University of Basel, Switzerland

10 <sup>(4)</sup>Novartis Institutes for Biomedical Research, Cambridge, MA, USA

11 <sup>(5)</sup>Novartis Pharma, Basel, Switzerland

12 <sup>(6)</sup>Department of Pharmacy, National University of Singapore, Singapore

13

14 #Corresponding Authors SBL & FB

15 Suresh B. Lakshminarayana

16 Novartis Institute for Tropical Diseases, 10 Biopolis Road, #05-01 Chromos

17 Singapore, 138670

18 Email: [suresh.b.lakshminarayana@novartis.com](mailto:suresh.b.lakshminarayana@novartis.com); Phone: +65 67222991

19

20 Francesca Blasco

21 Novartis Institute for Tropical Diseases, 10 Biopolis Road, #05-01 Chromos

22 Singapore, 138670

Running title: Preclinical PK-PD of antimalarials

23 Email: [francesca.blasco@novartis.com](mailto:francesca.blasco@novartis.com); Phone: +65 67222967

24

25 Present address:

26 <sup>(a)</sup>Public Health Research Institute Center, New Jersey, USA

27

28

29

30

31

32

33

34

35

36

37

38

39

40

41

42

43 **Supplementary material**

44

45 **Table S1.** *In vitro* PK properties of spiroindolone analogs

46

47 **Figure S1:** Structure of spiroindolone analogs

48 **Figure S2.** Goodness-of-fit plots for dose response relationship

49 **Figure S3.** Goodness-of-fit plots for pharmacokinetic modeling of KAE609

50 **Figure S4.** Dose proportionality for KAE609 in CD-1 mouse

51

52

53

54

55

56

57

58

59

60

61

62

63

64

65

66

67 **Table S1:** *In vitro* PK properties of spiroindolone analogs

68

| Compound                  | Solubility<br>(pH 6.8,<br>$\mu\text{M}$ ) <sup>(a)</sup> | PAMPA <sup>(b)</sup><br>%FA | Caco-2 <sup>(c)</sup><br>$P_{\text{app}}(\text{A-B})$<br>$10^{-6}$<br>cm/sec | Hepatic $\text{CL}_{\text{int}}$<br>in mouse<br>liver<br>microsomes <sup>(d)</sup><br>( $\mu\text{L}/\text{min}/\text{mg}$ ) | Mouse<br>PPB <sup>(e)</sup> (%) | <i>RBC to<br/>Plasma<br/>Ratio</i> <sup>(f)</sup> |
|---------------------------|----------------------------------------------------------|-----------------------------|------------------------------------------------------------------------------|------------------------------------------------------------------------------------------------------------------------------|---------------------------------|---------------------------------------------------|
| (+)- <b>1</b>             | 194                                                      | 97                          | 7.19                                                                         | 770                                                                                                                          | 98.4                            | 1.04                                              |
| (+)- <b>2</b>             | 22                                                       | 98                          | n.t                                                                          | 92                                                                                                                           | 99.8                            | 0.77                                              |
| (+)- <b>3</b>             | 8                                                        | 98                          | 41.7                                                                         | 35                                                                                                                           | 99.7                            | 0.93                                              |
| (+)- <b>4</b>             | 137                                                      | 97                          | 7.66                                                                         | 330                                                                                                                          | 98.8                            | 0.62                                              |
| (+)- <b>5</b>             | 131                                                      | 98                          | 4.33                                                                         | 26                                                                                                                           | 98.5                            | 1.18                                              |
| (+)- <b>6</b>             | 169                                                      | 99                          | 5.55                                                                         | 41                                                                                                                           | 99.5                            | 1.12                                              |
| (+)- <b>7</b><br>(KAE609) | 39                                                       | 98                          | 1.69                                                                         | 28                                                                                                                           | 99.8                            | 0.85                                              |
| (-)- <b>6</b>             | 112                                                      | 97                          | 4.8                                                                          | 36                                                                                                                           | 99.6                            | 0.81                                              |
| (-)- <b>7</b>             | 35                                                       | 98                          | 1.73                                                                         | 21                                                                                                                           | 99.4                            | 0.52                                              |

69

70

71 *In vitro* PK parameters like solubility, PAMPA, Caco-2 permeability, hepatic clearance,

72 mouse plasma protein binding and RBC to plasma partitioning were determined in a medium

73 to high through put format using in-house standard assay protocols that are described in the  
74 literature.

75 <sup>(a)</sup>HT-Equilibrium solubility at pH 6.8 (1); <sup>(b)</sup>Parallel Artificial Membrane Permeability Assay  
76 expressed in % fraction absorbed (FA) (2, 3); <sup>(c)</sup>Apparent permeability from apical to  
77 basolateral in Caco-2 cells expressed as  $P_{app}$  (A-B)  $10^{-6}$  cm/sec (4, 5), n.t, not  
78 tested; <sup>(d)</sup>intrinsic clearance in mouse liver microsomes expressed as  $\mu\text{L}/\text{min}/\text{mg}$  protein, in  
79 the presence of liver enzymes (6); <sup>(e)</sup>Mouse plasma protein binding using rapid equilibrium  
80 dialysis method (7, 8), <sup>(f)</sup>RBC to plasma ratio, mean from 1  $\mu\text{M}$  & 10  $\mu\text{M}$  (9).

81

82

83

84

85

86

87

88

89

90

91

92

93

94

95

96

97

98

99 **Figure S1.** Structure of spiroindolone analogs.

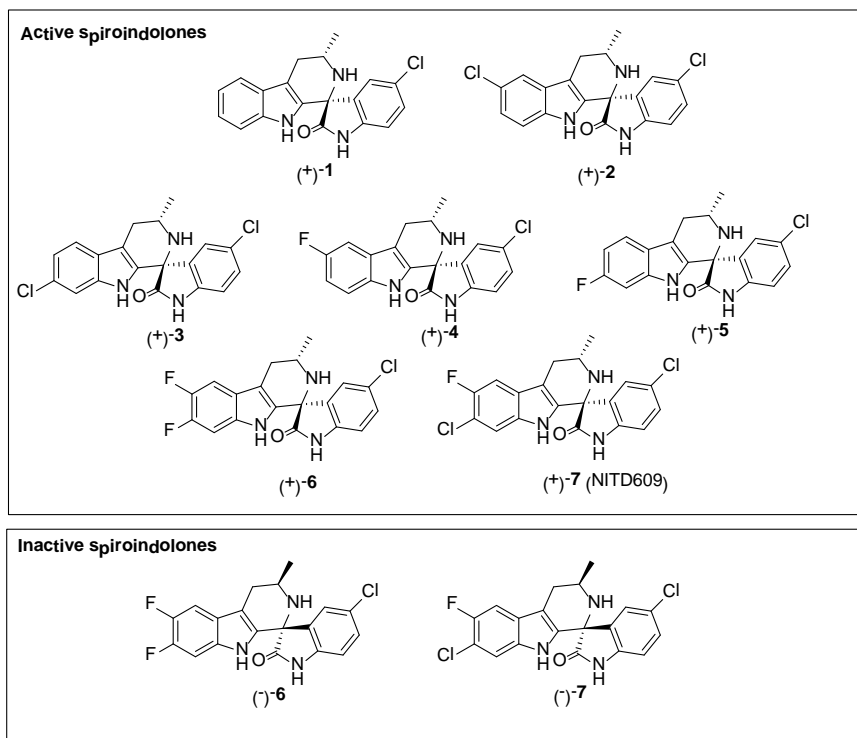

100

101 Active spiroindolones have the 1R, 3S configuration while inactive spiroindolones have the  
102 1S, 3R configuration (10).

103

104

105

106

107

108

109

110

111 **Figure S2.** Goodness-of-fit plots for dose response relationship

112

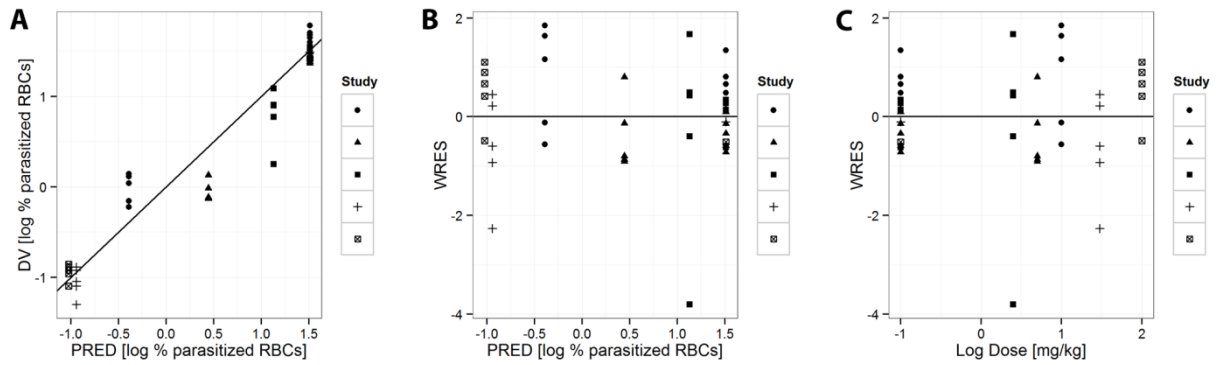

113

114

115 Goodness-of-fit plots for a representative compound [(+)-6] (A) observed data (DV) vs

116 populations predictions (PRED) (B) weighted residuals (WRES) vs PRED (C) WRES vs Dose

117

118

119

120

121

122

123

124

125

126

127

128 **Figure S3.** Goodness-of-fit plots for pharmacokinetic modeling of KAE609

129

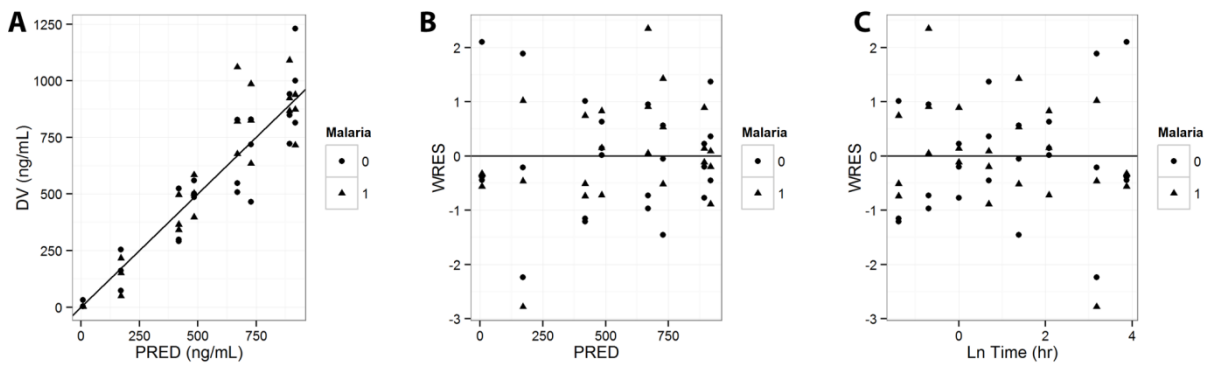

130

131

132 Goodness-of-fit plots for KAE609 pharmacokinetic modeling (A) observed data (DV) vs

133 populations predictions (PRED) (B) weighted residuals (WRES) vs PRED (C) WRES vs

134 Time

135

136

137

138

139

140

141

142

143

144



145 **Figure S4.** Dose proportionality for KAE609 in CD-1 mouse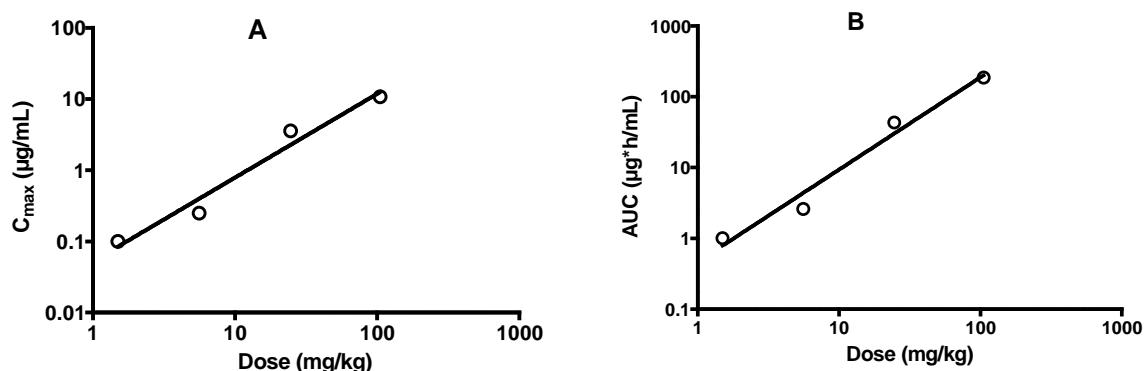146  
147

148 Dose linearity tests on  $C_{max}$  and  $AUC_{0-24}$  were carried out by the regression of log-  
149 transformed data (power regression model) (11, 12). Doses (1.5 – 105 mg/kg) and PK  
150 parameters ( $C_{max}$  and  $AUC_{0-24}$ ) were log-transformed, and correlation coefficient ( $R^2$ ), slope,  
151 and 95 % confidence intervals of slope were calculated using the GraphPad Prism version  
152 5.02 for windows (GraphPad software, San Diego, California USA). The system was  
153 considered to be linear when  $R^2 \sim 1$ , Slope 95 %  $CI_{lower} \geq 0.8$ , and  $CI_{upper} \leq 1.25$  (11, 12). (A)  
154 Dose vs  $C_{max}$  ( $R^2 = 0.97$ , Slope = 1.18, 95 %  $CI_{lower} = 0.52$  and  $CI_{upper} = 1.83$ ); (B) Dose vs  
155  $AUC_{0-24}$  ( $R^2 = 0.97$ , Slope = 1.30, 95 %  $CI_{lower} = 0.65$  and  $CI_{upper} = 1.96$ ). Based on the above  
156 observations, KAE609 shows nonlinear behavior in CD-1 mouse between the doses studied.

157

158

159

160

161

162

163  
164  
165  
166  
167  
168  
169  
170  
171  
172  
173  
174  
175  
176  
177  
178  
179  
180  
181  
182

## Reference List

- 1. Zhou, L., L. Yang, S. Tilton, and J. Wang.** 2007. Development of a high throughput equilibrium solubility assay using miniaturized shake-flask method in early drug discovery. *J.Pharm.Sci.* **96**:3052-3071. doi:10.1002/jps.20913 [doi].
- 2. Avdeef, A.** 2005. The rise of PAMPA. *Expert.Opin.Drug Metab Toxicol.* **1**:325-342. doi:10.1517/17425255.1.2.325 [doi].
- 3. Avdeef, A., S. Bendels, L. Di, B. Faller, M. Kansy, K. Sugano, and Y. Yamauchi.** 2007. PAMPA--critical factors for better predictions of absorption. *J.Pharm.Sci.* **96**:2893-2909. doi:10.1002/jps.21068 [doi].
- 4. Balimane, P. V. and S. Chong.** 2005. Cell culture-based models for intestinal permeability: a critique. *Drug Discov.Today* **10**:335-343. doi:S1359644604033549 [pii];10.1016/S1359-6446(04)03354-9 [doi].
- 5. Marino, A. M., M. Yarde, H. Patel, S. Chong, and P. V. Balimane.** 2005. Validation of the 96 well Caco-2 cell culture model for high throughput permeability assessment of discovery compounds. *Int.J.Pharm.* **297**:235-241. doi:S0378-5173(05)00186-9 [pii];10.1016/j.ijpharm.2005.03.008 [doi].
- 6. Obach, R. S.** 1999. Prediction of human clearance of twenty-nine drugs from hepatic microsomal intrinsic clearance data: An examination of in vitro half-life approach and nonspecific binding to microsomes. *Drug Metab Dispos.* **27**:1350-1359.

- 183 **7. Banker, M. J., T. H. Clark, and J. A. Williams.** 2003. Development and validation of  
184 a 96-well equilibrium dialysis apparatus for measuring plasma protein binding.  
185 *J.Pharm.Sci.* **92**:967-974. doi:10.1002/jps.10332 [doi].
- 186 **8. Kariv, I., H. Cao, and K. R. Oldenburg.** 2001. Development of a high throughput  
187 equilibrium dialysis method. *J.Pharm.Sci.* **90**:580-587. doi:10.1002/1520-  
188 6017(200105)90:5<580::AID-JPS1014>3.0.CO;2-4 [pii].
- 189 **9. Yu, S., S. Li, H. Yang, F. Lee, J. T. Wu, and M. G. Qian.** 2005. A novel liquid  
190 chromatography/tandem mass spectrometry based depletion method for measuring red  
191 blood cell partitioning of pharmaceutical compounds in drug discovery. *Rapid*  
192 *Commun.Mass Spectrom.* **19**:250-254. doi:10.1002/rcm.1777 [doi].
- 193 **10. Yeung, B. K., B. Zou, M. Rottmann, S. B. Lakshminarayana, S. H. Ang, S. Y.**  
194 **Leong, J. Tan, J. Wong, S. Keller-Maerki, C. Fischli, A. Goh, E. K. Schmitt, P.**  
195 **Krastel, E. Francotte, K. Kuhen, D. Plouffe, K. Henson, T. Wagner, E. A. Winzeler,**  
196 **F. Petersen, R. Brun, V. Dartois, T. T. Diagana, and T. H. Keller.** 2010.  
197 Spirotetrahydro beta-carbolines (spiroindolones): a new class of potent and orally  
198 efficacious compounds for the treatment of malaria. *J.Med.Chem.* **53**:5155-5164.  
199 doi:10.1021/jm100410f [doi].
- 200 **11. Hummel, J., S. McKendrick, C. Brindley, and R. French.** 2009. Exploratory  
201 assessment of dose proportionality: review of current approaches and proposal for a  
202 practical criterion. *Pharm.Stat.* **8**:38-49. doi:10.1002/pst.326 [doi].
- 203 **12. Smith, B. P., F. R. Vandenhende, K. A. DeSante, N. A. Farid, P. A. Welch, J. T.**  
204 **Callaghan, and S. T. Forgue.** 2000. Confidence interval criteria for assessment of dose  
205 proportionality. *Pharm.Res.* **17**:1278-1283.
- 206
